# Supplementary material for: Stress Impairs Skin Barrier Function and Induces α2-3 Linked N-Acetylneuraminic Acid and Core 1 O-Glycans on Skin Mucins in Atlantic Salmon, Salmo salar
Source: Int J Mol Sci. 2021 Feb 2;22(3):1488. doi: 10.3390/ijms22031488 (PMC7867331; doi:10.3390/ijms22031488)
Supplement: Supplementary file 1 [file ijms-22-01488-s001.xlsx]

## Sheet: Sheet1
										LD Control			LD Control			LD Control			LD Control			LD Control			LD Control			LD Control			LD Control			LD Control			LD Control			LD Control			LD Stress			LD Stress			LD Stress
m/z	Suggested structure	Charge	M	Composition						151			145			149			167			165			146			148			150			152			166			168			173			175			169
				Hexose	HexNAc	Fucose	NeuAc	NeuGc	Kdn	RT	Area	Abundance	RT	Area	Abundance	RT	Area	Abundance	RT	Area	Abundance	RT	Area	Abundance	RT	Area	Abundance	RT	Area	Abundance	RT	Area	Abundance	RT	Area	Abundance	RT	Area	Abundance	RT	Area	Abundance	RT	Area	Abundance	RT	Area	Abundance	RT
384.15	Galß1-3GalNAcol	1	385.15	1	1					nd	0	0	6.58	51882.9	0.836155	6.61	291391	1.06854	8.12	1418.09	0.196219	6.7	14579.1	0.490997	7.59	81884.8	0.790904	7.63	85749.2	0.984594	7.5	60683	0.915769	7.48	101863	0.760353	7.75	42723.7	0.536982	7.54	109400	0.62214	6.65	58061.6	0.502526	nd	0	0	nd
425.18	GlcNAcß1-3GalNAcol	1	426.18		2					nd	0	0	6.95	5225.45	0.0842145	6.9	15081.1	0.0553028	nd	0	0	nd	0	0	7.99	8854.19	0.0855204	8.11	5449.72	0.062575	8.02	9517.67	0.143631	7.94	8762.33	0.0654062	8.13	3660.95	0.0460134	7.99	29197.7	0.166043	6.94	15901.2	0.137625	nd	0	0	nd
425.18	GalNAcα1-3GalNAcol	1	426.18		2					nd	0	0	9	94350.1	1.52057	8.97	880868	3.23017	11.69	5870.31	0.812267	9.05	65254.4	2.19764	9.97	8522.31	0.0823148	10.1	95455.2	1.09604	10.07	54926.6	0.828898	9.92	211196	1.57647	10.15	339500	4.26708	10.05	318638	1.81204	9	101234	0.876185	nd	0	0	11.67
472.17	Kdnα2-6GalNAcol	1	473.17		1				1	nd	0	0	5.93	4426.51	0.0713385	6.22	16328.2	0.0598758	8.42	1355.53	0.187562	6.9	629.513	0.0212008	7.59	18605.6	0.179707	7.7	17354.7	0.199271	7.58	25271.9	0.38138	7.48	24880.3	0.185718	7.83	6649.52	0.083576	7.54	79853.3	0.454113	5.81	47720.1	0.41302	nd	0	0	nd
513.19	NeuAcα2-6GalNAcol	1	514.19		1		1			14.38	105662	37.7956	8.92	3.66259e+06	59.027	8.89	6.13307e+06	22.4901	12.31	289066	39.9976	9.37	1.56061e+06	52.5583	9.11	7.70548e+06	74.4253	9.23	4.59162e+06	52.7221	9.28	1.65908e+06	25.0372	9.06	7.13805e+06	53.2817	9.28	4.4256e+06	55.6242	9.18	4.42529e+06	25.166	8.76	6.05093e+06	52.3711	15.72	146227	62.2561	12.34
529.19	NeuGcα2-6GalNAcol	1	530.19		1			1		14.14	11752.4	4.20386	8.75	872375	14.0594	8.74	5.438e+06	19.9413	11.96	281155	38.903	9.2	399383	13.4504	8.95	1.20009e+06	11.5913	9.06	1.60713e+06	18.4535	9.03	3.58423e+06	54.0897	8.9	2.35017e+06	17.5428	9.2	320124	4.02355	8.94	7.59435e+06	43.1879	8.61	4.13739e+06	35.8093	15.45	15575.5	6.63126	12.02
571.24	Fuc-GalNAcα1-3GalNAcol	1	572.24		2	1				15.77	5882.65	2.10424	9.7	153650	2.47625	9.64	1.06269e+06	3.89691	13.04	21202.1	2.9337	9.82	22597.3	0.761034	10.6	12889.1	0.124492	10.82	179605	2.06227	10.61	14998.2	0.226339	10.63	5885.91	0.0439352	11.57	308201	3.87369	10.76	592891	3.37168	10.33	139540	1.20773	18.05	2369.68	1.00889	13.06
571.24	Fuc-GlcNAcß1-3GalNAcol	1	572.24		2	1				16.98	2574.8	0.921015	10.33	103479	1.6677	10.26	655838	2.40497	14.17	3234.91	0.447609	10.41	21847.6	0.735783	12.57	23354.8	0.225578	12.62	37262.1	0.427853	12.68	133269	2.01116	11.35	376203	2.80816	13.95	7891.27	0.0991832	12.65	197586	1.12364	11.84	16345.6	0.141472	nd	0	0	14.13
587.23	Galß1-3(GlcNAcß1-6)GalNAcol	1	588.23	1	2					nd	0	0	9.26	47248.9	0.761473	9.13	1.17955e+06	4.32542	12.08	1543.01	0.213504	9.29	32149.1	1.08272	10.15	86191.4	0.8325	10.19	144923	1.66405	10.25	88625.7	1.33745	10.09	231635	1.72904	10.33	28039.4	0.352419	10.23	427326	2.43014	9.26	26963.2	0.233368	16.58	456.958	0.19455	nd
587.23	HexNAc-Galß1-3GalNAcol	1	588.23	1	2					nd	0	0	9.44	7727.81	0.124543	nd	0	0	12.43	809.391	0.111994	9.73	3011.11	0.101408	10.51	14681.2	0.141802	10.64	17750.1	0.203811	nd	0	0	10.45	17245.2	0.128727	10.68	21672	0.27239	10.76	27407.5	0.155862	nd	0	0	nd	0	0	nd
587.23	Gabß1-4GlcNAcß1-3GalNAcol	1	588.23	1	2					17.02	6215.69	2.22337	10.33	26986.2	0.434915	10.35	239205	0.877171	14.29	1458.08	0.201752	10.41	8242	0.277574	12.03	71550.1	0.691084	12.26	17377.4	0.199532	12.41	10867.9	0.164008	11.35	58169.2	0.434203	11.57	26729.7	0.335958	11.39	128903	0.733053	10.33	53869.6	0.466244	18.11	1062.49	0.452353	14.29
593.15	SO3+NeuAcα2-6GalNAcol	1	594.15		2		1			15.81	299.763	0.107226	9.7	5968.31	0.0961865	9.64	37530	0.137623	12.99	5216.89	0.721853	11.58	12947.5	0.436048	9.53	107360	1.03696	9.66	62869.2	0.721881	9.72	55383.9	0.8358	9.39	16692.8	0.124603	9.8	35530.4	0.446572	9.61	37006.7	0.210451	10.33	9881.53	0.0855252	nd	0	0	13.11
593.15	SO3+NeuAcα2-6GalNAcol	1	594.15		2		1			16.92	237.636	0.0850033	10.33	11211.2	0.180681	10.26	23125.5	0.0848016	14.14	782.363	0.108254	12.88	20462.5	0.689135	10.33	162891	1.57332	10.46	94906	1.08973	10.43	64833.9	0.97841	10.27	25249.7	0.188476	10.51	50530.9	0.635108	10.32	71675.3	0.407606	11.3	5695.72	0.0492967	nd	0	0	14.26
634.22	Galß1-3(Kdnα2-6)GalNAcol	1	635.22	1	1				1	nd	0	0	11.65	3238.37	0.0521902	12.84	7350.4	0.0269541	14.41	278.006	0.0384673	10.84	5801.43	0.195381	nd	0	0	10.82	3961.98	0.0454924	9.2	3188.3	0.0481147	9.56	11053.2	0.082506	nd	0	0	9.18	7711.41	0.0438536	10.33	7778.09	0.0673198	nd	0	0	nd
675.25	GalNAcα1-3(Kdnα2-6)GalNAcol	1	676.25		2				1	nd	0	0	9.97	12052.4	0.194238	10.26	65116.7	0.238784	14.63	968.799	0.134051	10.64	2242.91	0.0755367	nd	0	0	nd	0	0	nd	0	0	10.54	14033.9	0.104756	10.68	11581.4	0.145564	10.58	10282.2	0.0584731	10.15	17249	0.149291	nd	0	0	14.55
675.25	Galß1-3(NeuAcα2-6)GalNAcol	1	676.25	1	1		1			16.03	2648.64	0.947428	9.7	80492.2	1.29723	9.81	101886	0.373618	13.91	2441.43	0.337817	10.16	40638.2	1.36862	11.58	68676.6	0.66333	11.71	79061.6	0.907805	11.77	74102.2	1.11828	11.62	104725	0.781715	11.84	91805.1	1.15387	11.75	108928	0.619457	9.7	64824.7	0.561061	17.22	10476.2	4.46023	13.86
675.25	NeuAcα2-3Galß1-3GalNAcol	1	676.25	1	1		1			18.72	2214.27	0.792052	11.47	70686.9	1.1392	11.6	28176.4	0.103324	16.65	776.759	0.107479	12.03	25107.1	0.845558	10.06	158271	1.5287	10.19	169448	1.94564	10.25	83110.8	1.25423	10.09	190044	1.41858	10.33	125549	1.57799	10.23	97284.3	0.553241	11.39	48029.1	0.415694	19.97	1658.09	0.705932	16.64
691.24	Galß1-3(NeuGcα1-6)GalNAcol	1	692.24	1	1			1		nd	0	0	9.7	5321.58	0.0857637	9.73	114523	0.419959	13.75	1091.81	0.151072	10.07	4818.72	0.162285	10.06	9580.64	0.0925369	10.19	18210.8	0.209101	10.16	11503.9	0.173606	10	19678	0.146886	10.24	2590.42	0.0325583	10.14	22670.6	0.128924	10.5	2120.48	0.0183529	nd	0	0	nd
691.24	NeuGcα1-3Galß1-3GalNAcol	1	692.24	1	1			1		nd	0	0	nd	0	0	nd	0	0	nd	0	0	nd	0	0	nd	0	0	nd	0	0	nd	0	0	11.35	2667.83	0.0199139	nd	0	0	11.39	7971.07	0.0453303	9.61	16836.5	0.145721	nd	0	0	nd
716.27	GlcNAcß1-3(NeuAcα2-6)GalNAcol	1	717.27		2		1			16.19	2313.59	0.827578	9.88	12147.1	0.195765	9.9	30481.4	0.111776	14.08	825.957	0.114286	10.23	5933.19	0.199818	10.24	23475.4	0.226743	10.37	22466.3	0.257964	10.43	4612.36	0.0696053	10.27	28195.8	0.210467	10.51	13057.4	0.164114	10.32	21123	0.120123	9.79	22648.3	0.196022	nd	0	0	14.15
716.27	GalNAcα1-3(NeuAcα2-6)GalNAcol	1	717.27		2		1			19.6	85287.2	30.5075	12.2	333291	5.37138	12.3	3.80417e+06	13.95	17.58	29876.1	4.13391	12.79	394292	13.279	12.21	14829.7	0.143236	12.35	329729	3.78603	12.41	78948.6	1.19142	12.25	786120	5.86797	12.39	1.10983e+06	13.9492	12.28	593529	3.37531	12.02	212918	1.84281	20.95	21670.3	9.22613	17.58
732.27	GlcNAcß1-3(NeuGcα2-6)GalNAcol	1	733.27		2			1		nd	0	0	9.79	2422.31	0.0390384	9.81	16705.3	0.0612589	13.96	807.713	0.111762	10.16	1015	0.0341833	10.15	3630.41	0.0350652	10.28	6577.65	0.0755263	10.34	6857.36	0.103485	10.09	6401.6	0.0477845	10.42	1031.92	0.0129699	10.23	36197.5	0.205849	9.7	13277.8	0.11492	nd	0	0	nd
732.27	GalNAcα1-3(NeuGcα2-6)GalNAcol	1	733.27		2			1		19.35	13649.8	4.88258	12.02	116231	1.8732	12.05	4.39336e+06	16.1106	17.31	43483.9	6.0168	12.6	135469	4.56233	12.03	1456.63	0.0140692	12.16	141715	1.62721	12.22	120847	1.82371	12.07	312015	2.32903	12.3	88862.3	1.11689	12.11	1.35688e+06	7.71638	11.84	196546	1.70112	20.73	1801.12	0.766825	17.27
733.29	Galß1-4(Fucα1-3)GlcNAcß1-3GalNAcol	1	734.29	1	2	1				nd	0	0	nd	0	0	nd	0	0	nd	0	0	nd	0	0	nd	0	0	nd	0	0	nd	0	0	nd	0	0	nd	0	0	nd	0	0	8.52	21884.2	0.189409	nd	0	0	nd
733.29	Fuc-HexNAc-Galß1-3GalNAcol	1	734.29	1	2	1				nd	0	0	11.65	31100.4	0.50122	nd	0	0	nd	0	0	11.67	2470.35	0.0831965	12.75	16252.8	0.156982	12.8	18799.6	0.215862	12.85	11538.8	0.174132	12.7	33182.3	0.247688	12.93	99755.3	1.2538	nd	0	0	11.75	14214.1	0.123024	20.01	5016.89	2.13594	nd
733.29	Fuc-HexNAc-Galß1-3GalNAcol	1	734.29	1	2	1				nd	0	0	nd	0	0	nd	0	0	nd	0	0	nd	0	0	13.38	16010.1	0.154637	13.17	46850	0.537943	13.48	5762.42	0.0869609	13.44	53712.3	0.400934	13.67	16872.2	0.212062	nd	0	0	12.39	8741.83	0.075661	nd	0	0	nd
749.28	Galß1-3(Galß1-4GlcNAcß1-6)GalNAcol	1	750.28	2	2					18.62	2693.57	0.963501	11.38	5419.95	0.087349	11.33	135102	0.495423	15.95	1150.6	0.159207	11.4	5121.52	0.172483	12.3	117789	1.1377	12.44	16936	0.194464	12.5	23421.6	0.353456	12.34	21089.2	0.15742	12.48	11800.5	0.148317	12.47	58815.5	0.334475	11.39	8963.1	0.0775761	19.93	764.688	0.325565	nd
749.28	Galß1-4GlclNAcß1-3Galß1-3GalNAcol	1	750.28	2	2					19.6	1280.41	0.458009	12.02	3564.11	0.0574399	11.97	136089	0.49904	16.68	258.612	0.0357838	12.03	4027.83	0.13565	13.74	8934.16	0.0862927	13.07	10728.9	0.123192	13.12	4629.93	0.0698704	13.07	9078.61	0.0677671	13.29	15137.8	0.190263	13.19	15523	0.0882771	11.93	5066.45	0.0438504	20.5	1216.06	0.517737	nd
755.2	SO3+Galß1-3(NeuAcα2-6)GalNAcol	1	756.2	1	1		1			18.87	1460.47	0.522416	11.92	34637.9	0.558232	12.05	48143.6	0.176544	17.26	3634.65	0.502921	nd	0	0	10.78	40629.9	0.392433	10.9	36229.9	0.416001	10.96	33988.7	0.512925	10.72	49809.4	0.371801	10.95	33567.6	0.421902	10.85	29832.9	0.169655	11.66	18746.9	0.162255	nd	0	0	nd
755.2	SO3+Galß1-3(NeuAcα2-6)GalNAcol	1	756.2	1	1		1			nd	0	0	nd	0	0	nd	0	0	nd	0	0	13.06	11692	0.393765	nd	0	0	nd	0	0	nd	0	0	nd	0	0	nd	0	0	nd	0	0	nd	0	0	nd	0	0	nd
790.31	HexNAc-Gal-GalNAcα1-3GalNAcol	1	791.31	1	3					nd	0	0	10.51	2395.26	0.0386026	10.52	83245.4	0.305263	nd	0	0	10.64	2707.31	0.0911769	11.4	1713.46	0.0165498	11.62	14967.8	0.171864	11.68	2763.78	0.0417083	11.53	21187.2	0.158152	11.66	3954.99	0.0497091	11.66	45348.7	0.257891	10.5	430.431	0.0037254	nd	0	0	nd
790.31	HexNAc-Galß1-3(GlcNAcß1-6)GalNAcol	1	791.31	1	3					nd	0	0	nd	0	0	nd	0	0	nd	0	0	nd	0	0	11.67	1429.53	0.0138075	11.89	3423.22	0.0393063	11.95	963.905	0.0145463	nd	0	0	11.93	3331.74	0.0418757	nd	0	0	10.77	592.187	0.00512541	nd	0	0	nd
790.31	Gal-(HexNAc1-6)GalNAcα1-3GalNAcol	1	791.31	1	3					18.45	1562.52	0.55892	11.2	19665.3	0.31693	11.15	94686.5	0.347218	nd	0	0	11.34	3810.48	0.128329	12.21	11788.4	0.113862	12.35	27012.7	0.310167	12.31	23250.3	0.350871	12.16	29291.7	0.218647	12.48	9207.59	0.115728	12.28	98138.1	0.558096	11.22	6301.01	0.0545355	nd	0	0	nd
790.31	HexNAc-Galß1-3(GlcNAcß1-6)GalNAcol	1	791.31	1	3					nd	0	0	nd	0	0	12.13	16143.3	0.059198	nd	0	0	12.2	1237.66	0.041682	13.11	1044.62	0.0100897	13.17	15676.2	0.179998	nd	0	0	13.16	4960.31	0.0370261	13.29	1749.62	0.0219905	13.28	19060.4	0.108393	12.11	551.528	0.0047735	nd	0	0	nd
790.31	HexNAc-Gal-GlcNAcß1-3GalNAcol	1	791.31	1	3					nd	0	0	13.49	5794.35	0.0933829	13.51	6339.15	0.0232458	nd	0	0	nd	0	0	14.55	1572.94	0.0151926	14.47	4339.2	0.0498239	14.6	10475.7	0.158088	14.56	21119.9	0.157649	nd	0	0	14.67	26242	0.149234	nd	0	0	nd	0	0	nd
837.3	Gal-GalNAcα1-3(Kdnα2-6)GalNAcol	1	838.3	1	2				1	nd	0	0	10.87	739.263	0.0119141	10.43	5551.01	0.0203557	nd	0	0	nd	0	0	10.51	1103.95	0.0106628	10.82	1462.24	0.0167898	10.7	838.885	0.0126596	10.72	2722.8	0.0203243	nd	0	0	10.76	3650.1	0.0207575	nd	0	0	nd	0	0	nd
862.33	Fuc-GalNAcα1-3(NeuAcα2-6)GalNAcol	1	863.33		2	1				20.95	16649	5.95541	13.21	54339.6	0.875749	13.42	425571	1.56058	18.81	3100.78	0.42905	13.93	28103.9	0.946484	13.2	3666.33	0.0354121	13.26	56524.2	0.649025	13.3	9186.04	0.138627	13.25	73817	0.551005	13.39	93072.4	1.1698	13.28	82304.4	0.468052	13.08	16942.4	0.146637	22.2	2530.75	1.07747	18.82
878.33	Hex-GlcNAcβ1-3(NeuAcα2-6)GalNAcol	1	879.33		2	1		1		19.1	3015.13	1.07852	11.74	14035.7	0.226202	11.79	31435.1	0.115273	17.03	649.013	0.089803	12.2	7447.83	0.250828	nd	0	0	nd	0	0	12.22	3972.37	0.0599471	12.07	26182.5	0.195438	12.2	32723.2	0.411289	12.11	14706.6	0.083634	11.66	11896.2	0.102962	20.39	1166.26	0.496532	17
878.33	Hex-GalNAcα1-3(NeuAcα2-6)GalNAcol	1	879.33	1	2		1			nd	0	0	nd	0	0	12.75	101223	0.371189	nd	0	0	13.25	32993.2	1.11115	12.03	41759.8	0.403347	12.62	119128	1.36786	12.68	8466.65	0.12777	12.52	89058	0.664771	12.75	4044.98	0.0508402	13.1	292205	1.66173	nd	0	0	nd	0	0	nd
878.33	Fuc-GalNAcα1-3(NeuGcα2-6)GalNAcol	1	879.33	1	2		1			20.66	1159.66	0.414815	13.04	17768	0.286353	13.13	442246	1.62173	18.59	4181.25	0.578553	13.66	14766	0.49729	13.65	2024.16	0.0195509	nd	0	0	13.12	16329.9	0.246435	13.72	6500.22	0.0485207	13.29	7777.69	0.0977556	14.85	8474.35	0.0481923	12.9	18480.2	0.159947	21.24	779.092	0.331698	18.49
894.32	Hex-GalNAcß1-3(NeuGcα2-6)GalNAcol	1	895.32	1	2			1		nd	0	0	11.56	2386.79	0.0384659	11.69	33866.1	0.124188	16.77	690.489	0.0955419	12.03	1541.89	0.0519279	11.94	4348.36	0.0419997	11.98	6555.03	0.0752665	12.04	7043.49	0.106294	11.88	7826.46	0.0584204	12.11	1719.31	0.0216096	12.02	22944	0.130479	11.57	8867.54	0.076749	nd	0	0	nd
894.32	Hex-GalNAcα1-3(NeuGcα2-6)GalNAcol	1	895.32	1	2			1		nd	0	0	nd	0	0	12.47	162122	0.594507	nd	0	0	12.97	6016.41	0.202621	nd	0	0	12.44	19984.1	0.229462	12.41	12757.1	0.192518	12.34	30231.3	0.225661	12.48	312.716	0.00393044	12.47	81477	0.463347	nd	0	0	nd	0	0	nd
936.37	HexNAc-(Fuc-)HexNAc-Galß1-3GalNAcol	1	937.37	1	3	1				nd	0	0	12.11	13101.7	0.21115	nd	0	0	16.87	383.053	0.0530025	12.26	1069.07	0.0360041	13.11	27826.3	0.268767	13.17	67993.4	0.780717	13.21	5357.32	0.0808476	13.16	49753	0.37138	13.39	107889	1.35602	13.28	4731.3	0.0269062	12.11	10284.9	0.0890159	20.73	1119.92	0.476806	nd
936.37	Galß1-3(Fuc-HexNAc-GlcNAcß1-6)GalNAcol	1	937.37	1	3	1				nd	0	0	12.11	22894.7	0.368975	12.21	40518.5	0.148582	17.07	259.837	0.0359533	12.31	3225.72	0.108636	13.29	8411.98	0.0812491	nd	0	0	13.48	5956.23	0.0898857	13.44	25476.3	0.190167	13.48	32851.7	0.412903	13.56	4703.04	0.0267455	12.3	8447.02	0.0731094	20.75	982.932	0.418483	nd
936.37	Fuc-HexNAc-Galß1-3(GlcNAcß1-6)GalNAcol	1	937.37	1	3	1				nd	0	0	12.75	11279.2	0.181778	nd	0	0	nd	0	0	12.88	1084.55	0.0365256	13.91	2111.07	0.0203903	13.17	67993.4	0.780717	14.25	7124.59	0.107517	nd	0	0	14.19	13326.4	0.167496	14.11	4806.5	0.0273338	12.9	2354.74	0.0203804	nd	0	0	nd
936.37	Fuc-HexNAc-Gal-GalNAcα1-3GalNAcol	1	937.37	1	3	1				nd	0	0	nd	0	0	13.13	189584	0.695208	nd	0	0	13.34	4754.28	0.160115	nd	0	0	14.28	41186.1	0.472909	14.25	7031.28	0.106109	14.27	106962	0.798416	14.38	15995.3	0.20104	14.39	30917.9	0.175825	13.18	920.334	0.00796554	nd	0	0	nd
936.37	Fuc-HexNAc-Galß1-3(GlcNAcß1-6)GalNAcol	1	937.37	1	3	1				nd	0	0	nd	0	0	nd	0	0	nd	0	0	nd	0	0	nd	0	0	nd	0	0	nd	0	0	nd	0	0	nd	0	0	nd	0	0	nd	0	0	nd	0	0	nd
936.37	Fuc-HexNAc-Gal-GlcNAcß1-3GalNAcol	1	937.37	1	3	1				nd	0	0	14.61	28987	0.46716	14.63	27762.8	0.101807	nd	0	0	nd	0	0	15.5	1779.95	0.0171921	15.57	20761.2	0.238386	15.81	29289	0.442001	15.85	78782.9	0.588073	nd	0	0	15.67	46731.1	0.265753	nd	0	0	23.67	1809.18	0.770258	nd
936.37	Fuc-HexNAc-Gal-GlcNAcß1-3GalNAcol	1	937.37	1	3	1				nd	0	0	16.55	3859.22	0.062196	nd	0	0	nd	0	0	nd	0	0	nd	0	0	nd	0	0	17.69	1970.98	0.0297441	17.77	3763.62	0.0280935	18	3283.13	0.0412648	nd	0	0	nd	0	0	nd	0	0	nd
952.31	HexNAc-Galß1-3(Galß1-4GlcNAcß1-6)GalNAcol	1	953.31	2	3					nd	0	0	12.57	1418.86	0.0228666	12.56	300824	1.10313	nd	0	0	12.69	7299.49	0.245833	13.47	2257.94	0.0218089	nd	0	0	nd	0	0	nd	0	0	nd	0	0	nd	0	0	nd	0	0	nd	0	0	nd
952.31	Gal-(Galß1-4HexNAc1-6)GalNAcα1-3GalNAcol	1	953.31	2	3					nd	0	0	12.97	2000.39	0.0322386	12.84	112765	0.413513	nd	0	0	13.06	1179.83	0.0397343	13.82	8538.68	0.082473	13.72	18720.1	0.214949	13.91	17029.2	0.256989	13.9	23532.8	0.17566	13.86	4011.76	0.0504227	13.74	140295	0.797836	nd	0	0	nd	0	0	nd
966.25	NeuAca2-3Galb1-3(NeuAca2-6)GalNAcol	1	967.25	1	1		2			20.82	13002.1	4.65089	13.49	194323	3.13175	13.89	41632.6	0.152668	19.34	14737.7	2.03923	14.73	40124.7	1.35132	12.21	156602	1.51258	12.26	194002	2.22758	12.31	173060	2.61165	12.07	295532	2.20599	12.3	203382	2.55625	12.19	143334	0.815116	13.18	107532	0.930694	22.27	10908.2	4.64417	19.29
1024.38	Fuc-HexNAc-Galß1-3(NeuAcα2-6)GalNAcol	1	1025.38	1	2	1	1			nd	0	0	13.84	10097.9	0.162739	13.89	7239.43	0.0265472	nd	0	0	14.26	1809.62	0.0609444	14.27	11282.5	0.108974	14.28	6340.33	0.0728013	14.34	2654.44	0.0400583	14.27	10252.7	0.0765308	14.48	40063.2	0.503543	nd	0	0	13.79	1812.94	0.0156911	22.81	6289.92	2.67793	nd
1024.38	Fuc-HexNAc-Galß1-3(NeuAcα2-6)GalNAcol	1	1025.38	1	2	1	1			nd	0	0	14.45	5072.99	0.0817574	14.53	1770.33	0.00649183	nd	0	0	nd	0	0	nd	0	0	nd	0	0	nd	0	0	nd	0	0	nd	0	0	nd	0	0	nd	0	0	nd	0	0	nd
1040.38	Fuc-HexNAc-Galß1-3(NeuGcα2-6)GalNAcol	1	1041.38	1	2	1		1		nd	0	0	13.68	604.847	0.00974784	nd	0	0	nd	0	0	nd	0	0	13.29	493.052	0.00476226	13.26	425.586	0.00488669	nd	0	0	nd	0	0	13.29	383.744	0.00482317	nd	0	0	13.83	262.569	0.00227255	nd	0	0	nd
1040.38	Fuc-HexNAc-Galß1-3(NeuGcα2-6)GalNAcol	1	1041.38	1	2	1		1		nd	0	0	14.22	929.722	0.0149836	14.17	8266.93	0.030315	nd	0	0	14.59	449.165	0.015127	14.37	5809.39	0.0561114	14.38	3537.51	0.0406186	nd	0	0	14.27	2699.2	0.0201481	14.57	3562.56	0.0447768	14.49	1551.83	0.00882502	13.96	448.502	0.00388181	nd	0	0	nd
1040.38	NeuAcα2-3Galß1-3(Gal-GlcNAcß1-6)GalNAcol	1	1041.38	2	2		1			nd	0	0	15.99	8057.48	0.129856	16.2	2062.39	0.00756284	nd	0	0	16.67	1577.18	0.0531164	16.07	8854.36	0.085522	15.99	8679.48	0.09966	15.9	7664.63	0.115667	16.04	13979.6	0.10435	16.21	11574.6	0.145477	16.21	7885.19	0.0448418	15.93	3841.69	0.03325	nd	0	0	nd
1040.38	NeuAcα2-3Galß1-3(Gal-GlcNAcß1-6)GalNAcol	1	1041.38	2	2		1			nd	0	0	18.79	3147.68	0.0507287	18.96	1495.97	0.00548576	nd	0	0	19.67	619.29	0.0208565	18.26	4175.02	0.0403254	18.19	2661.23	0.0305569	18.13	2891.22	0.0436314	18.28	5395.31	0.0402731	18.5	4457.79	0.0560287	18.41	3453.5	0.0196395	18.72	1206.97	0.0104464	nd	0	0	nd
1040.38	NeuAcα2-3Gal-HexNAc-Galß1-3GalNAcol	1	1041.38	2	2		1			nd	0	0	19.58	901.625	0.0145308	19.74	648.27	0.00237722	nd	0	0	20.32	427.558	0.0143993	19.44	2271.62	0.021941	19.37	2367.49	0.0271841	19.3	821.715	0.0124005	19.52	2310.84	0.0172492	19.64	1545.45	0.0194244	19.61	1566.3	0.0089073	19.37	3976.64	0.034418	nd	0	0	nd
1081.41	HexNAc-HexNAc-Galß1-3(NeuGcα2-6)GalNAcol	1	1082.41	1	3		1			nd	0	0	nd	0	0	13.7	4789.51	0.0175632	nd	0	0	14.18	722.411	0.0243294	13.38	1098.27	0.0106079	13.45	8526.99	0.0979091	13.57	797.948	0.0120419	13.44	2927.03	0.0218487	13.67	3941.61	0.049541	13.56	6156.25	0.0350096	nd	0	0	nd	0	0	nd
1098.42	Gal-(Fuc-)HexNAc-Gal-GalNAcα1-3GalNAcol	1	1099.42	2	3	1				nd	0	0	nd	0	0	10.7	17473.6	0.0640762	nd	0	0	nd	0	0	nd	0	0	13.26	735.097	0.00844057	12.76	7577	0.114345	12.61	2878.2	0.0214843	12.84	2047.29	0.0257317	13.38	3937.19	0.0223902	nd	0	0	nd	0	0	nd
1098.42	Fuc-HexNAc-Galβ1-3(Gal-GlcNAcβ1-6)GalNAcol	1	1099.42	2	3	1				nd	0	0	nd	0	0	nd	0	0	nd	0	0	nd	0	0	15.41	3722.06	0.0359504	nd	0	0	15.42	899.872	0.01358	nd	0	0	15.67	2758.05	0.0346651	nd	0	0	nd	0	0	nd	0	0	nd
1098.42	Galβ1-3(Gal-(Fuc-)HexNAc-GlcNAcβ1-6)GalNAcol	1	1099.42	2	3	1				nd	0	0	15.57	993.528	0.0160119	15.65	20977.4	0.0769247	nd	0	0	nd	0	0	16.69	2283.61	0.0220568	16.11	5840.55	0.0670627	16.67	10701.3	0.161494	16.72	33605.4	0.250846	nd	0	0	16.39	10051.5	0.0571614	nd	0	0	nd	0	0	nd
1098.42	Fuc-HexNAc-Gal-HexNAc-Galß1-3GalNAcol	1	1099.42	2	3	1				nd	0	0	16.24	2544.48	0.0410073	16.2	7671.08	0.02813	nd	0	0	nd	0	0	17.28	1063.29	0.0102701	16.53	6951.32	0.0798168	17.16	2352.55	0.0355024	17.35	16092	0.120118	nd	0	0	16.78	6838.54	0.0388897	nd	0	0	nd	0	0	nd
1098.42	Fuc-HexNAc-Galβ1-3(Gal-GlcNAcβ1-6)GalNAcol	1	1099.42	2	3	1				nd	0	0	17.18	2103.53	0.033901	nd	0	0	nd	0	0	nd	0	0	18.33	3165.68	0.0305764	18.29	2950.78	0.0338816	nd	0	0	nd	0	0	18.5	10761.5	0.135258	nd	0	0	nd	0	0	nd	0	0	nd
1114.42	Gal-HexNAc-Galß1-3(Gal-GlcNAcß1-6)GalNAcol	1	1115.42	3	3					nd	0	0	15.3	487.382	0.00785475	15.37	18273.8	0.0670105	nd	0	0	15.51	256.163	0.00862707	16.41	9179.95	0.0886668	nd	0	0	16.3	568.081	0.00857293	nd	0	0	16.53	1471.4	0.0184936	16.49	3012.15	0.0171296	nd	0	0	nd	0	0	nd
1139.45	HexNAc-(Fuc-)HexNAc-Galß1-3(GlcNAcß1-6)GalNAcol	1	1140.45	1	4	1				nd	0	0	nd	0	0	nd	0	0	nd	0	0	13.25	186.99	0.00629745	13.91	7196.27	0.0695069	14	6689.61	0.0768118	14.06	2227.41	0.0336139	14.18	6266.27	0.0467744	14.19	15907.9	0.199941	14.21	1305.9	0.00742647	13.08	2585.12	0.0223744	nd	0	0	nd
1139.45	HexNAc-(Fuc-)HexNAc-Gal-HexNAc-GalNAcol	1	1140.45	1	4	1				nd	0	0	13.4	7019.42	0.113126	13.42	33480.1	0.122772	nd	0	0	13.56	598.707	0.0201633	nd	0	0	14.66	23264.8	0.267132	14.51	2321.93	0.0350404	14.47	41477.2	0.309606	14.67	12166.5	0.152917	14.76	4639.96	0.0263867	13.44	1513.94	0.0131033	nd	0	0	nd
1227.34	HexNAc-(Fuc-)GlcNAc-Galß1-3(NeuAcα2-6)GalNAcol	1	1228.34	1	3	1	1			nd	0	0	14.01	4639.19	0.0747661	14.17	5210.82	0.0191082	nd	0	0	14.55	510.74	0.0172007	14.27	12139.7	0.117255	14.38	26215	0.301007	14.34	1726.7	0.0260577	14.27	23635.1	0.176423	14.48	41620.6	0.523118	14.39	1905.02	0.0108336	13.96	1322.74	0.0114484	23.01	998.642	0.425171	20.98
1227.34	Fuc-HexNAc-Gal-HexNAc-(NeuAcα2-6)GalNAcol	1	1228.34	1	3	1	1			nd	0	0	15.57	2274.94	0.0366634	15.83	8506.23	0.0311926	nd	0	0	16.39	1448.43	0.0487804	nd	0	0	15.57	14140.1	0.16236	15.54	449.399	0.00678189	15.48	14734.9	0.109989	nd	0	0	15.67	4099.23	0.0233117	nd	0	0	nd	0	0	nd
1227.34	Fuc-HexNAc-Gal-HexNAc-(NeuAcα2-6)GalNAcol	1	1228.34	1	3	1	1			nd	0	0	nd	0	0	nd	0	0	nd	0	0	nd	0	0	nd	0	0	nd	0	0	15.9	1180.89	0.0178209	15.94	14775.7	0.110293	nd	0	0	nd	0	0	nd	0	0	nd	0	0	nd
1243.46	Gal-HexNAc-Gal-GalNAcα1-3(NeuAcα2-6)GalNAcol	1	1244.46	2	3		1			nd	0	0	nd	0	0	15	21981.4	0.0806064	nd	0	0	15.45	2646.6	0.0891324	nd	0	0	14.28	4270.23	0.0490319	14.77	777.296	0.0117302	14.75	2852.93	0.0212957	14.48	2626.91	0.0330168	14.85	7411.83	0.0421499	nd	0	0	nd	0	0	nd
1243.46	Fuc-HexNAc-Gal-HexNAc-(NeuGcα2-6)GalNAcol	1	1244.46	1	3	1		1		nd	0	0	nd	0	0	15.65	15027.3	0.0551056	nd	0	0	nd	0	0	nd	0	0	14.75	4565.14	0.0524181	15.19	1037.09	0.0156508	15.29	7937.98	0.0592528	nd	0	0	15.4	5418.06	0.0308116	nd	0	0	nd	0	0	nd
1243.46	Fuc-HexNAc-Gal-HexNAc-(NeuGcα2-6)GalNAcol	1	1244.46	1	3	1		1		nd	0	0	nd	0	0	nd	0	0	nd	0	0	nd	0	0	nd	0	0	15.32	3599.68	0.0413325	15.66	2116.15	0.0319349	15.75	6985.49	0.052143	nd	0	0	nd	0	0	nd	0	0	nd	0	0	nd
1257.44	NeuAcα2-3Galß1-3(NeuAcα2-8NeuAcα2-6)GalNAcol	1	1258.44	1	1		3			nd	0	0	nd	0	0	nd	0	0	nd	0	0	nd	0	0	12.92	1234	0.0119189	12.98	1056.18	0.0121273	12.94	1962.44	0.0296153	12.79	3131.46	0.0233747	13.02	2825.28	0.0355102	12.92	1873.96	0.0106569	nd	0	0	nd	0	0	nd
1259.5	NeuGcα2-6HexNAc-Galß1-3(Gal-GlcNAcß1-6)GalNAcol	1	1260.5	2	3			1		nd	0	0	nd	0	0	14.72	45606.5	0.16724	nd	0	0	15.27	336.82	0.0113434	nd	0	0	14.57	2646.36	0.0303862	14.6	590.984	0.00891856	14.56	1520.65	0.0113508	14.48	520.619	0.00654351	14.76	10762.6	0.0612054	nd	0	0	nd	0	0	nd
1301.5	HexNAc-(Fuc-)HexNAc-Galß1-3(Gal-GlcNAcß1-6)GalNAcol	1	1302.5	2	4	1				nd	0	0	16.18	2022.35	0.0325925	16.11	31625	0.11597	nd	0	0	nd	0	0	15.33	13119.9	0.126721	15.32	1689.4	0.0193981	nd	0	0	nd	0	0	15.55	3420.02	0.0429852	nd	0	0	nd	0	0	nd	0	0	nd
1301.5	HexNAc-(Fuc-)HexNAc-Galß1-3(Gal-GlcNAcß1-6)GalNAcol	1	1302.5	2	4	1				nd	0	0	16.58	666.619	0.0107434	16.57	17413.2	0.0638548	nd	0	0	nd	0	0	17.17	6355.42	0.0613854	17.07	16927.6	0.194367	16.83	1651.69	0.0249258	17.06	10362.9	0.0773536	17.44	14363.7	0.180533	17.16	13828.2	0.0786386	nd	0	0	nd	0	0	nd
1301.5	Fuc-HexNAc-Gal-HexNAc-Gal-HexNAc-GalNAcol	1	1302.5	2	4	1				nd	0	0	18.96	660.808	0.0106497	nd	0	0	nd	0	0	nd	0	0	nd	0	0	17.58	1057.11	0.0121381	17.58	6419.62	0.0968786	17.77	45634.7	0.340639	nd	0	0	17.8	3667.4	0.0208559	nd	0	0	nd	0	0	nd
1463.55	Galß1-3(HexNAc-(Fuc-)HexNAc-(Gal-)Gal-GlcNAcß1-6)GalNAcol	1	1464.55	3	4	1				nd	0	0	nd	0	0	16.57	13928.4	0.0510758	nd	0	0	nd	0	0	nd	0	0	nd	0	0	nd	0	0	nd	0	0	nd	0	0	nd	0	0	nd	0	0	nd	0	0	nd
751.79	HexNAc-(Fuc-)HexNAc-Gal-(Gal-HexNAc-)GalNAcα1-3GalNAcol	2	1504.58	2	5	1				nd	0	0	nd	0	0	15.83	5307.16	0.0194615	nd	0	0	nd	0	0	nd	0	0	nd	0	0	nd	0	0	16.82	2649.48	0.019777	nd	0	0	17.01	2769.57	0.0157501	nd	0	0	nd	0	0	nd
751.79	HexNAc-(Fuc-)HexNAc-Gal-(Gal-HexNAc-)GalNAcα1-3GalNAcol	2	1504.58	2	5	1				nd	0	0	nd	0	0	16.3	8732.34	0.0320217	nd	0	0	nd	0	0	nd	0	0	17.33	9442.78	0.108424	nd	0	0	17.44	7678.4	0.0573152	17.6	3309.42	0.0415952	17.49	1880.62	0.0106948	nd	0	0	nd	0	0	nd
795.79	Gal-HexNAc(Fuc-HexNAc-Gal)GalNAcα1-3(NeuAcα2-6)GalNAcol	2	1592.58	2	4	1	1			nd	0	0	nd	0	0	17.81	3297.11	0.0120906	nd	0	0	nd	0	0	nd	0	0	17.48	6615.51	0.0759609	nd	0	0	18.11	12501.8	0.0933194	nd	0	0	17.72	4087.53	0.0232451	nd	0	0	nd	0	0	nd
											279561			6.20494e+06			2.72701e+07			722708			2.96929e+06			1.03533e+07			8.70909e+06			6.62645e+06			1.33968e+07			7.95626e+06			1.75844e+07			1.15539e+07			234880
[truncated: 110 more columns]
